# Supplementary material for: Modulation of charge conduction in ZnO nanowires through selective surface molecular functionalization
Source: Royal Society of Chemistry journal article supplement (doi:10.1039/c2nr31442h), 2012-01-01
Supplement: c2nr31442h.pdf [file c2nr31442h.pdf]

**Modulation of Charge Conduction in ZnO Nanowires Through  
Selective Surface Molecular Functionalization  
- Supplementary Information**

Tej Belagodu, Ebraheem Ali Azhar and Hongbin Yu\*  
School of Electrical, Computer and Energy Engineering,  
Arizona State University, Tempe, AZ, USA.  
Fax: 480 965 4455; Tel: 480 965 4455  
\*E-mail: yuhb@asu.edu

Supplementary graphs: Gate response of ZnO nanowire device before and after functionalization

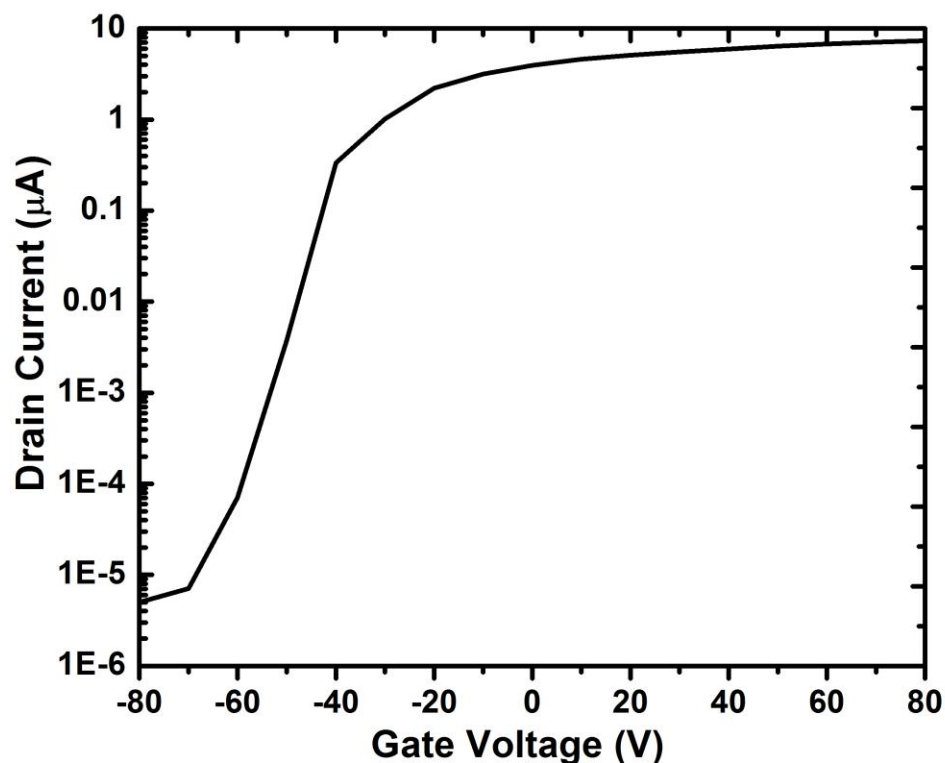

**Figure S1** Source-drain current vs gate voltage plot for ZnO field-effect transistor before chemical treatment, using heavily doped Si substrate as back gate. Source-drain bias  $V_{ds}$  was 1 V. Current magnitude changes 6 orders of magnitude, and can be completely shut-off at negative gate bias. Electron mobility of the ZnO NW device was calculated to be  $127 \text{ cm}^2/\text{Vs}$ .

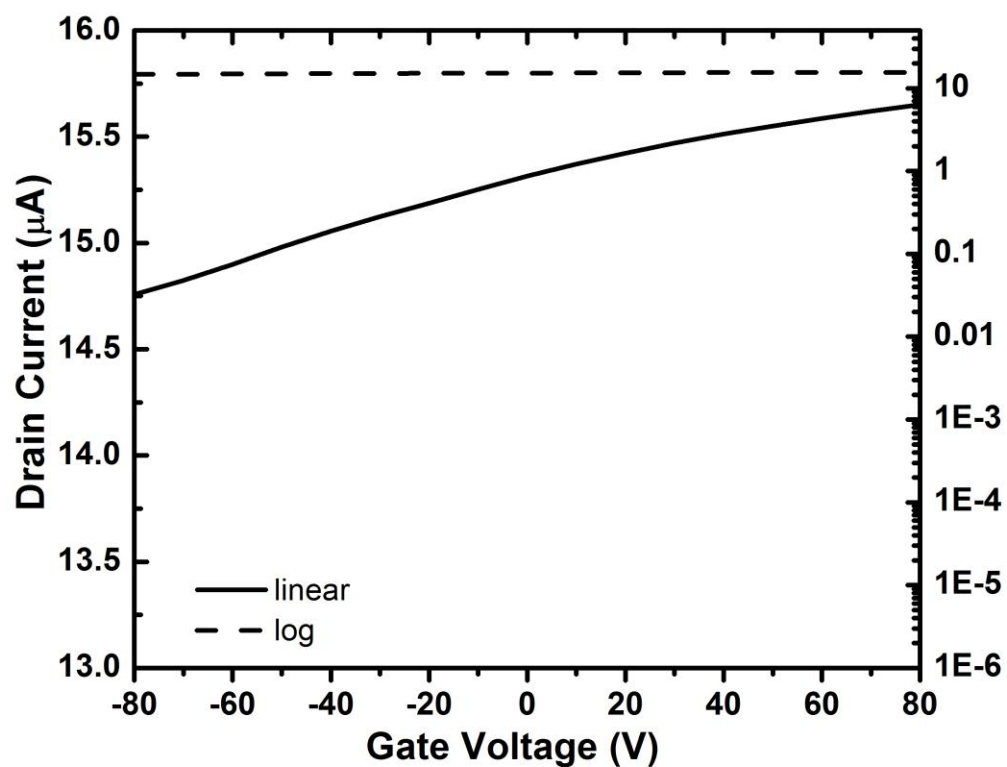

**Figure S2** Source-drain current vs gate voltage plot for ZnO field-effect transistor after device was functionalized with APTES. Source-drain bias  $V_{ds}$  was 1 V. Dashed line: current in log scale; solid line: current in linear scale.
